# 1 Ultra-fast Prediction of Somatic Structural Variations by Reduced Read 2 Mapping via Pan-Genome *k*-mer Sets

3

4 Min-Hak Choi<sup>1,#</sup>, Jang-il Sohn<sup>1,2,#</sup>, Dohun Yi<sup>1,#</sup>, A Vipin Menon<sup>1</sup>, Yeon Jeong Kim<sup>4</sup>, Sungkyu Kyung<sup>5</sup>,  
5 Seung-Ho Shin<sup>5</sup>, Byunggook Na<sup>6</sup>, Je-Gun Joung<sup>4</sup>, Sungro Yoon<sup>6</sup>, Youngil Koh<sup>7</sup>, Daehyun Baek<sup>8</sup>,  
6 Tae-Min Kim<sup>9</sup>, and Jin-Wu Nam<sup>1,2,3\*</sup>

7

8 <sup>1</sup>Department of Life Science, Hanyang University, Seoul 04763, Republic of Korea,

9 <sup>2</sup>Research Institute for Convergence of Basic Sciences, Hanyang University, Seoul 04763, Republic  
10 of Korea,

11 <sup>3</sup>Research Institute for Natural Sciences, Hanyang University, Seoul 04763, Republic of Korea,

12 <sup>4</sup>Samsung Genome Institute, Samsung Medical Center, 81 Irwon-ro, Gangnam-gu, Seoul, 06351,  
13 Republic of Korea,

14 <sup>5</sup>GENINUS Inc, Seoul 05836, Republic of Korea,

15 <sup>6</sup>Department of Electrical and Computer Engineering, Seoul National University, 08826, Republic of  
16 Korea,

17 <sup>7</sup>College of Medicine, Seoul National University, Seoul 03080, Republic of Korea,

18 <sup>8</sup>School of Biological Sciences, Seoul National University, Seoul 08826, Republic of Korea.

19 <sup>9</sup>Department of Medical Informatics and Cancer Research Institute, College of Medicine, The  
20 Catholic University of Korea, Seoul 06591, Republic of Korea.

21

22 <sup>#</sup>These authors contributed equally

23 <sup>\*</sup>Correspondence: Jin-Wu Nam

24 Tel: +82-2-2220-2428, Fax: +82-2-2298-0319, Email: jwnam@hanyang.ac.kr

25

## 26 Contributions

27 MHC, JIS, DHY, and AVM performed analyses; MHC, JIS, DHY, and AVM contributed to writing  
28 the codes; MHC, JIS, BKN, and SRY contributed to parallel computing; YK and Genius provided  
29 validation datasets; YJK and JGJ performed experimental validations; JIS and JWN contributed to  
30 writing the manuscript; DHB, TMK, and JWN supervised the project; and JWN conceived the idea.

31

32 **Keywords:** Somatic structural variation, whole genome sequencing, cancer panel sequencing, fusion  
33 gene, pan-genome *k*-mer set, reduced mapping



35 **ABSTRACT**

36 Genome rearrangements often result in copy number alterations of cancer-related genes and cause the  
37 formation of cancer-related fusion genes. Current structural variation (SV) callers, however, still  
38 produce massive numbers of false positives (FPs) and require high computational costs. Here, we  
39 introduce an ultra-fast and high-performing somatic SV detector, called ETCHING, that significantly  
40 reduces the mapping cost by filtering reads matched to pan-genome and normal *k*-mer sets. To reduce  
41 the number of FPs, ETCHING takes advantage of a Random Forest classifier that utilizes six  
42 breakend-related features. We systematically benchmarked ETCHING with other SV callers on  
43 reference SV materials, validated SV biomarkers, tumor and matched-normal whole genomes, and  
44 tumor-only targeted sequencing datasets. For all datasets, our SV caller was much faster ( $\geq 15X$ ) than  
45 other tools without compromising performance or memory use. Our approach would provide not only  
46 the fastest method for largescale genome projects but also an accurate clinically practical means for  
47 real-time precision medicine.

48

## 49 **Introduction**

50 Chromosomal rearrangements in coding regions and regulatory non-coding elements often cause  
51 malignancy of somatic cells. Although structural variations (SVs) occur much less frequently than  
52 single nucleotide variations (SNVs), the SVs often have a greater impact on cellular functions and  
53 gene expression<sup>1</sup>. In particular, large SVs (>1Kbp), which include large insertions (INSs), deletions  
54 (DELs), inversions (INVs), duplications (DUPs), and translocations (TRAs), are more often  
55 associated with gain- and/or loss-of-function of cancer-related genes and druggable target genes for  
56 cancer treatments than are SNVs<sup>2-7</sup>. For instance, *ERBB2* amplification in breast cancers (BRCA) <sup>8,9</sup>,  
57 *EML4-ALK* fusion in lung cancer <sup>10</sup>, and *BCR-ABL* fusion in chronic myeloid leukemia <sup>11</sup> are well-  
58 known SV-driven cancer drivers and actionable targets for cancer treatments. Hence, the rapid  
59 detection of cancer-related SVs is indispensable for companion diagnostics and targeted cancer  
60 therapy.

61 So far, a handful of SV callers have been introduced to find germline and somatic SVs in  
62 normal and/or tumor samples by using a read-based approach — read-depth<sup>12</sup>, discordant read-pairs  
63 <sup>13</sup>, soft-clipped reads<sup>14-16</sup>, and their combinations<sup>17-21</sup> — or by using a *k*-mer-based approach<sup>22</sup>. Some  
64 of them utilize local assembly of reads<sup>13, 20-22</sup> to precisely detect breakpoints (BPs) and SV types.  
65 Regardless of the approach, all current SV callers require genome mapping of all input reads.  
66 Although the mapping process is an indispensable step for the confident identification of SVs, it  
67 consumes most of the computing time in processing massive whole genome sequencing (WGS) data.  
68 For instance, the genome mapping of 30X WGS data from a cancer patient takes ~300 hours with a  
69 single thread on a high-performing computer, resulting in delayed diagnosis. Furthermore, SV studies  
70 for largescale WGS projects, such as those undertaken by the Pan-Cancer Analysis of Whole  
71 Genomes (PCAWG)<sup>23</sup> and the Genome Aggregation Database (gnomAD)<sup>24</sup> consortiums, would be  
72 only doable by institutes with access to a giant computing facility or expensive cloud computing  
73 services.

74 The majority of sequenced reads are reference reads (perfectly matched to the reference  
75 genome), which could be dispensable for SV calling. Mapping the reference reads consumes

76 expensive computing time. It may also increase background noise resulting from imprecise and  
77 ambiguous alignments of the reads (mainly due to repeats or low-complexity regions) or from  
78 unresolved misassemblies of the reference <sup>25, 26</sup>. Thus, only mapping informative (non-reference)  
79 reads to detect SVs would both reduce computing time and increase accuracy.

80 In general, somatic SV callers use a case-control design that compares tumor (case) SVs with  
81 those of matched normals (control) to detect somatic (case-specific) SVs. The absence of matched  
82 normal samples may lead to either a failure of SV-calling or a high FP rate spawned by germline SVs.  
83 In particular, cancer panel sequencing is frequently carried out using only tumor samples. Using the  
84 pan-genome sequences containing all non-medical variations instead of a matched normal sample  
85 would help to enhance the accuracy of SV calling in this situation.

86 In this study, we developed ETCHING, an ultra-fast SV detection method. Our approach  
87 significantly reduces the number of reads to be mapped by excluding those from the reference and/or  
88 pan-genome *k*-mer (PGK) set. This new strategy drastically reduces running time (it is at least ~15  
89 times faster than other methods) without compromising performance by taking advantage of machine-  
90 learning-based classification to remove FP SVs further. ETCHING displays either comparable to or  
91 better accuracy than other state-of-the-art SV detection tools on benchmarking whole genome and  
92 panel sequencing datasets as well as reference materials.

93

## 94 **Results**

### 95 **Fast prediction of somatic SVs**

96 We report the development of ETCHING (Efficient deTection of CHromosomal rearrangements and  
97 fusIoN Genes) – a fast computational SV caller that comprises four stepwise modules: Filter, Caller,  
98 Sorter, and Fusion-identifier (Fig. 1a; Supplementary Fig. 1; see Methods for more details). The Filter  
99 module uses one of three different filters: a Pan-Genome  $k$ -mer (PGK) filter that excludes tumor reads  
100 in which all  $k$ -mers are present in PGK, a Normal filter that removes those reads in which all  $k$ -mers  
101 come from normal reads (not using reference genomes), or a combined (PGKN) filter (Fig. 1b). PGK  
102 is a unique set of 31-mers from 10 human genome assemblies and nonpathogenic single nucleotide  
103 polymorphisms (SNPs) from dbSNP ( $\sim 3.9 \times 10^9$   $k$ -mers; Supplementary Fig. 2; Supplementary Table  
104 1). This module allows us to collect tumor-specific (TS) reads by filtering reference reads, those with  
105 germline variations, and those matched to normal reads. We used The Cancer Genome Atlas (TCGA)  
106 BRCA WGS data used in a previous SV study<sup>27</sup> for checking the Filter module. Of the BRCA  
107 samples, 31 and 9 were selected for training and hold-out test, respectively, by random selection  
108 (Methods; Supplementary Table 2). For the hold-out test dataset, the Filter module excluded about  
109 96.2% of the reads by PGK, 99.2% by Normal, and 99.4% by PGKN (Fig. 1c). The remaining TS  
110 reads clearly present BPs with a sharp decay of read-depth in somatic DEL, DUP, INV, and TRA  
111 examples, reminiscent of the chemical etching process (Fig. 1d). This filtration method significantly  
112 shortened the mapping process. The mapping time for TS reads from the nine hold-out BRCA WGS  
113 datasets with varied coverages (33–68X and 27–56X in tumor and normal samples, respectively) was  
114 approximately 300 times faster than that for all reads (Unfiltered) using BWA-MEM<sup>28</sup> (Fig. 1e).

115 After mapping TS reads to the reference genome (hg19), the Caller module collects simple-  
116 clipped reads to find initial BPs (Supplementary Fig. 3a) and then defines breakends (BNDs) for BP  
117 pairs by considering the clipped direction (Supplementary Fig. 3b). The identified BNDs were then  
118 assigned to an SV type, such as DEL, DUP, INV, and TRA, according to their position and the  
119 clipped direction (Supplementary Fig. 3c; Methods). Next, the Sorter module predicts a confidence  
120 score for each SV call using machine learning models pre-trained over the 31 training datasets

121 (Methods). Because there is no ground truth for the TCGA dataset, we instead used a silver standard  
122 set of SVs, simultaneously detected by multiple SV callers, during training and evaluation (Methods).  
123 Random Forest <sup>29</sup> (RF)-based sorter was chosen as our default SV sorter module (Methods;  
124 Supplementary Fig. 4). In the last step, with the predicted SVs, the Fusion-identifier module predicts  
125 fusion-gene (FG) candidates (Methods).

126 We compared the running time of ETCHING with those of other SV callers over the hold-out  
127 test dataset. The CPU time (running time converted in a single thread) for the entire SV prediction  
128 process of ETCHING was at least 15 times less than those of the other SV callers (Fig. 1f). In real  
129 (wall-clock) time, ETCHING took 2.2 hours on average, meaning that it was at least 6.6 times faster  
130 than the second-fastest caller (Manta), on 30 threads (Supplementary Fig. 5). The ETCHING process  
131 not only reduced the running time but also increased the precision of the SV prediction (Fig. 1g). The  
132 PGK, Normal, and PGKN filters gradually reduced the number of FP reads with little compromise of  
133 the true positive (TP) rates, resulting in better performances (F1-score) with the filters on BRCA  
134 WGS and HCC1395 cell line WGS datasets (Fig. 1g; Supplementary Fig. 6). Taken together, these  
135 results suggest that ETCHING provides high-performance SV prediction at a faster rate than other SV  
136 callers.

137

### 138 **ETCHING displays robust performance**

139 We next sought to systematically benchmark the performance of ETCHING against the performances  
140 of the read-based callers DELLY, LUMPY, Manta, and SvABA, as well as that of a *k*-mer-based  
141 caller, novoBreak, over WGS data from the HCC1395 cancer cell line (50X) and its matched normal  
142 cell line, HCC1395 BL (30X). Because the HCC1395 dataset also lacks ground-truth SVs, we again  
143 used the approach of employing silver standard SVs identified by multiple callers, mentioned above.  
144 The precision-recall (PR) curves over varying parameters showed that ETCHING performed more  
145 robustly than the other callers, particularly for precision (Fig. 2a). We obtained optimal cutoffs, which  
146 were used in the following benchmarking analyses for fair comparisons (Fig. 2a, red indicator;  
147 Methods).

148           Because the performances of SV callers tend to be affected by the read-depth<sup>30</sup>, we then  
149 examined the robustness of the SV callers over varying read-depths. For this comparison, we  
150 randomly subsampled 40% (20X), 60% (30X), and 80% (40X) of the reads from the HCC1395 cancer  
151 line (50X) while keeping the depth of the normal reads fixed, and then performed benchmarking  
152 analyses with the optimal cutoffs (Fig. 2b). ETCHING displayed a robust performance, regardless of  
153 the read-depth, and showed a slightly increased precision as the read-depth became higher. In contrast,  
154 Manta and SvABA presented lower recall rates at low read-depths but performances that were  
155 comparable to that of ETCHING at 50X.

156           To compare the performance of ETCHING on primary tumor samples with varying read-  
157 depth and tumor purity with those of the other tools, the nine hold-out BRCA samples were again  
158 used as the benchmarking dataset (Supplementary Table 2). In this analysis, ETCHING showed  
159 results that were superior or comparable to those of other tools, regardless of the SV type (Fig. 2c).  
160 Notably, ETCHING robustly predicted all SV types while displaying high F1-scores across samples,  
161 compared to other tools. We also benchmarked the SV callers over 33 true SVs from four thyroid  
162 cancer (THCA) samples of TCGA as an independent evaluation dataset. The performance of  
163 ETCHING was comparable to those of SvABA and novoBreak in terms of the F1-scores (Fig. 2d;  
164 Supplementary Fig. 7; Supplementary Table 3).

165           Because the silver standard set of SVs could still include FPs, we selected high-quality (HQ)  
166 SVs with depth-difference and connect-pair scores for DEL/DUP and INV/TRA, respectively  
167 (Supplementary Fig. 8; see Supplementary Note for details). With HQ SVs, ETCHING still displayed  
168 an accuracy that was comparable or superior to that of the other tools (Supplementary Fig. 9).

169

#### 170 **SV prediction of experimentally validated targets**

171 For experimental validation of the SV callers, we newly sequenced the whole genomes of 26 multiple  
172 myeloma (MM) samples with matched normal samples (Supplementary Table 4). We first  
173 benchmarked the SV callers using the MM samples, and found that ETCHING outperformed the  
174 others over a silver standard set of all SV types (Fig. 2e; Supplementary Fig. 9 and 10). Notably, its



175 performance exceeded that of another *k*-mer-based caller, novoBreak, which showed a lower  
176 precision, particularly for INV and TRA types.

177 We then evaluated all of the SV callers using known clinical SV biomarkers of MM, such as  
178 DELs (in 1q25, *p16*, *RBI*, and *TP53*) and IGH rearrangements (including DELs and TRAs)(Fig. 3a)<sup>31</sup>.  
179 Fluorescence *in situ* hybridization (FISH) and karyotype were first examined on the SV biomarkers  
180 (Supplementary Table 5). However, because FISH probe sets (Supplementary Table 6) of the SV  
181 biomarkers cannot discern focal deletion/duplication from (partial) aneuploidy, the true set of  
182 biomarker SVs were selected through a manual curation by considering read-depth changes and  
183 unbalanced minor allele frequency (Supplementary Fig. 11a,b) as well as discordant paired-reads in  
184 tumor and normal samples for each patient (Supplementary Fig. 11c–e; Methods). The SV set  
185 supported by FISH and/or karyotype (excluding aneuploidy) were well overlapped with manually  
186 curated SV biomarkers (Fig. 3b). We accordingly benchmarked ETCHING and other SV callers with  
187 the manually curated SV biomarkers as a true set. The receiver operating characteristics (ROC)  
188 showed that ETCHING displays comparable or slightly better performances than other callers in the  
189 SV biomarker level (Fig. 3c). Of 23 curated biomarkers, ETCHING detected 19. When breaking  
190 down the *IGH* rearrangements into SV level, known MM target genes, *FGFR3*, *IL6ST*, *CCND3*,  
191 *CCND1*, and *IPLL5* were detected as translocation partners by manual curation (Fig. 3b middle;  
192 Supplementary Table 7). Of the 38 SVs, ETCHING detected 17 SVs but missed seven including a  
193 *p16* DEL (MM17), three *IGH* DELs (MM10, 12, and 18), and three *IGH* TRAs (MM1, 11, and 14)  
194 (Fig. 3b).

195 We further searched for SVs related to actionable (cancer-druggable and clinically verified)  
196 targets from the OncoKB database<sup>32</sup>. ETCHING detected five actionable SV targets – *BRCA2* DEL  
197 (MM22), *ALK* DUP (SNUH19\_MM04), *PIK3CA* DUP (MM15), *AKT1* DUP (MM3), and *NTRK1*  
198 DUP (SNUH19\_MM01) (Fig. 3b,d). Of the five predicted targets, three targets (excluding those from  
199 the MM3 and MM15 patients, which lack tumor DNA quantities) were verified by targeted PCR (Fig.  
200 3e). The PCR products expected after amplification of *ALK* DUP (SNUH19\_MM04), *BRCA2* DEL

201 (MM22), and *NTRK1* DUPs (SNUH19\_MM01) were observed in tumor but not in normal samples,  
202 indicating that the SV targets are true cases.

203

#### 204 **SV and FG prediction in cancer panel sequencing**

205 Targeted gene panel sequencing is more relevant than WGS for clinical applications, and clinical  
206 laboratories daily produce panel sequencing data with the aim of finding actionable target variations,  
207 SNVs, SVs, and FGs. Targeted gene panel sequencing is often applied to detect low-frequency  
208 alterations such as somatic SNVs or FGs in cell-free DNA from cancer patients. To test the  
209 effectiveness of the SV callers in such clinical situations, we analyzed 56 targeted gene panel  
210 sequencing data derived from three types of cell-free DNA (cfDNA) reference material (Methods):  
211 Complete Reference (CR), Complete Mutation Mix (CMM), and Mutation Mix v2 (MMv2). Each  
212 type contains two or three synthetic FGs with low mutant allele ratios (0.5–5%) and wild-type (WT)  
213 alleles from a cell line, GM24385.

214 Because cancer panel sequencing approaches generally lack matched normal data, ETCHING  
215 was first set to use a PGK filter to extract TS reads for SV prediction. Other benchmarking tools, with  
216 the exception of novoBreak, also predict SVs in the absence of normal data. novoBreak, given its  
217 requirement for normal data, used simulated data from the hg19 reference genome (Methods). Note  
218 that we ran all tools with default parameters that display a better recall rate for panel sequencing data.

219 This analysis showed that, along with LUMPY and DELLY, ETCHING is one of the top  
220 callers in terms of recall over such low mutant allele frequencies (Fig. 4a,b), while showing a  
221 moderate level of additional calls in targeted regions (Fig. 4c). Additional calls could be either FP  
222 calls or germline SVs from the WT sample. Compared to other tools, ETCHING barely predicted  
223 additional calls in non-target regions, indicating a relatively low frequency of FP calls (Fig. 4c, gray).  
224 Because the reference materials include WT data that lack mutant alleles, the benchmarking analyses  
225 of SV prediction were also performed using the WT data as the normal sample. ETCHING was then  
226 set to use a PGKN filter. Unlike the other tools, ETCHING and LUMPY maintained high recall rates  
227 (Supplementary Fig. 12) compared to the results obtained without WT data (Fig. 4a,b). This result

228 indicates that ETCHING and LUMPY can effectively remove FPs without compromising the recall  
229 rate for targeted gene panel sequencing data, regardless of the presence of matched normal data. Since  
230 BreaKmer<sup>33</sup> is specialized for targeted sequencing data, we also tested it on the same dataset.  
231 However, BreaKmer failed to report any result (Methods).

232 Then, on the cancer panel sequencing data from formalin-fixed paraffin-embedded (FFPE)  
233 and frozen tissues from a previous study of BreaKmer<sup>33</sup>, we evaluated the performances of  
234 ETCHING and other tools including BreaKmer. The data consists of 105 replicates from 37 samples  
235 of different types of cancers (Supplementary Table 8). Because the data included tumor samples  
236 without matched normal samples, ETCHING utilized the PGK, rather than the PGKN, filter for this  
237 prediction as above. All settings for the other tools were the same as were used for the reference  
238 materials. Since the data contains small variants in *FLT3* and *KIT*, we included small variations in this  
239 analysis (Methods). We first ran BreaKmer and compared its results to those of the previous study<sup>33</sup>.  
240 BreaKmer was still very specific, giving only 479 additional calls across all 105 cases. However, it  
241 showed a lower recall rate (78 out of 105) than that they reported. It is possibly due to the lack of bait  
242 information or using a different version of BreaKmer (Methods). Other tools showed comparable  
243 recall rates (94 to 103 out of 105). Although DELLY showed the most sensitive performance, it was  
244 at the cost of massive additional calls (about one million). ETCHING found 98 true variants, and its  
245 number of additional calls was the lowest level except BreaKmer.

246 ETCHING was one of three tools that were able to detect all eight *FLT3* indels, which  
247 appeared in diverse forms including seven cases of DUPs (32-73bp) and one case of small indel (30bp)  
248 (Supplementary Fig. 13). Taken together, these results indicate that ETCHING shows high  
249 performance for detecting SVs and FGs in both WGS and targeted sequencing data, indicating its  
250 general usability.

251

## 252 **Benchmarking computational efficiency**

253 ETCHING significantly reduced the running time through implementation of the Filter module,  
254 resulting in computational speeds that were at least 15 times faster than those of the other tools (Fig.

255 1f). Such fast predictions result from significantly reduced genome mapping of reads. Although  
256 novoBreak also takes advantage of the *k*-mer approach to assembly TS contigs with BPs, it requires  
257 prior genome mapping of all reads to find read clusters, which is a time-consuming step. To confirm  
258 this conclusion, we determined the running times of ETCHING and novoBreak for each step (read  
259 filtration, mapping, and SV calling) on the HCC1395 dataset (Fig. 5a). As shown in Fig. 1f, based on  
260 its CPU time, ETCHING was approximately 15 times faster than novoBreak, mostly due to a  
261 reduction in the mapping time. In fact, most of novoBreak's running time was spent in the mapping  
262 step (87%, 283.5 CPU-hours), whereas ETCHING used about 13% of its running time for this step  
263 (2.6 CPU-hours; Fig. 5a). Unlike other tools, ETCHING significantly reduces computational costs  
264 through its filtration-and-mapping strategy (Fig. 5b). Using multiple processes (30 threads) for  
265 parallel computing, ETCHING completed the entire procedure for nine hold-out datasets in 2.2h on  
266 average and for HCC1395 in 1.5h (Supplementary Fig. 5 and 14). Application of different numbers of  
267 threads showed that the efficiency of ETCHING approached saturation (1.5h) over 25 threads  
268 (Supplementary Fig. 15).

269 Computational efficiency reflects both speed and memory usage, which have a trade-off  
270 relationship. However, benchmarking the memory usages of SV callers on 20X and 61X tumor  
271 samples showed no such relationship (Fig. 5c), which is probably because the memory usage is more  
272 dependent on the number of *k*-mers than the sequencing depth. In fact, ETCHING consistently used  
273 ~12G RAM, regardless of the size of the input dataset, which is comparable or more efficient than  
274 other tools in terms of memory usage. This fixed memory usage is mostly attributable to the size of  
275 the PGKN set, which is the least variable. Taken together, these results show that ETCHING is  
276 computationally very efficient, yet does not exhibit compromised performance.

277

## 278 **Discussion**

279 Here, we introduced a high performing and very efficient SV caller, ETCHING, which takes  
280 advantage of a scalable PGK set ( $>3.9 \times 10^9$  31-mers). Matched normal samples can extend  
281 ETCHING to the PGKN *k*-mer set to enrich reads with somatic variations. *k*-mer counting, and

282 searching for an exact  $k$ -mer in the large  $k$ -mer set, impose critical challenges on  $k$ -mer-based SV  
283 callers. ETCHING utilized K-mer Counter (KMC)<sup>34</sup> for efficient  $k$ -mer counting and employed a  
284 parallel roll-encoding method for searching for TS  $k$ -mers, allowing a highly efficient  $k$ -mer  
285 processing method.

286 ETCHING has excellent potential for the prediction of somatic SVs, even without matched  
287 normal data. The PGK filter module can remove reads present in pan-genome or containing common  
288 variations from tumor sequencing data (Fig. 1b). Although ETCHING may produce FPs, it is still  
289 useful in the absence of matched normal data (Fig. 1g; Supplementary Fig. 6). This flexibility will be  
290 quite helpful, particularly for clinical sequencing, which often lacks such matched normal data (Fig.  
291 4).

292 ETCHING found five additional druggable SV targets (in *ALK*, *NTRK1*, *BRCA2*, *PIK3CA*,  
293 and *AKT1*), three of which (*ALK*, *NTRK1*, and *BRCA2*) were validated by PCR analysis, in MM  
294 patients who did not carry SV biomarkers. *ALK* amplification is a potential molecular target in several  
295 cancers and *ALK* inhibitors could be beneficial to patients carrying such an *ALK* amplification<sup>35</sup>.  
296 Because multiple SV events of DELs, DUPs, and INVs were detected around the *NTRK1* gene in  
297 SNUH19\_MM01, the two most likely paths for their creation were confirmed by PCR (Figure 3e).  
298 Although the *NTRK1-LMNA* fusion is known to be a druggable target, the amplification of 1q23.1,  
299 where the *NTRK1* locus resides, has also been proposed as a candidate hotspot in the progression of  
300 MM<sup>36</sup>. Because *BRCA2* loss of function is a known cancer driver, we examined biallelic inactivation  
301 of the *BRCA2* gene by searching for somatic or germline SNVs or indels at that locus but confirmed  
302 no clinically relevant variations in the other allele.

303 ETCHING can also predict other types of variations, such as germline and *de novo* mutations.  
304 With a  $k$ -mer set from a reference genome (such as hg19), it can predict germline SVs. If we use  $k$ -  
305 mers of parental genome sequences, ETCHING can find *de novo* mutations in offspring genomes. The  
306 current version of ETCHING predicts FG candidates from DNA sequencing data, but the detection of  
307 high-confidence FGs requires transcriptome data, such as RNA-seq. Such detection will be possible,  
308 without a need for other FG callers, by using a  $k$ -mer set of reference transcriptomes or RNA-seq data

309 from normal samples. Hence, by the selection of an appropriate  $k$ -mer set, ETCHING can be a multi-  
310 purpose predictor for diverse types of genomic variations and FGs.

311 Although both ETCHING and novoBreak take advantage of TS reads to predict somatic SVs,  
312 the main strategy of ETCHING is distinct from that of novoBreak, which collects TS reads by  
313 comparing tumor and normal reads after mapping (the mapping-and-filtration approach). Instead,  
314 ETCHING uses a filtration-and-mapping approach, which makes ETCHING much faster than  
315 novoBreak, by as much as an order of magnitude (Fig. 5; Supplementary Fig. 15). In addition,  
316 novoBreak performs a local *de novo* assembly using the resulting TS reads to assemble TS contigs,  
317 which is another source of the heavy computational burden. The resulting contigs are aligned to a  
318 reference genome to predict SVs and BPs based on the mapping patterns of the contigs. Thus, the risk  
319 of misassembly also cannot be neglected. In contrast, ETCHING predicts all possible SVs using split-  
320 reads of TS reads and filters FPs by a RF module, achieving a low FP rate.

321 In summary, ETCHING is the fastest method for SV and FG prediction, and this speed has  
322 been achieved without compromising its performance or memory usages. We believe that our new  
323 approach will not only provide an efficient strategy for predicting various variations in mega-genome  
324 projects but will also contribute to real-time clinical applications.

325

### 326 **Data availability**

327 WGS data from 26 MM samples can be downloaded from the Clinical & Omics Data Archive  
328 (CODA; registration number: R002594) of the Korean National Institute of Health. Targeted gene  
329 panel sequencing data from reference materials are available at our website  
330 (<http://big.hanyang.ac.kr/ETCHING>).

331

### 332 **Code availability**

333 ETCHING was designed for 64-bit Linux systems. At least 16 GB of RAM is required. We  
334 recommend at least 64 GB. All source and binary codes used in the study are available at  
335 <http://big.hanyang.ac.kr/ETCHING> and GitHub (<https://github.com/ETCHING-team/ETCHING>).

336

337 **Acknowledgments**

338 We thank all of the BIGLab members, and Professor Sun Kim of Seoul National University for  
339 critical reading and comments. This work was supported by the National Research Foundation (NRF)  
340 funded by the Ministry of Science & ICT (2014M3C9A3063541 to JWN) and by the Korean Health  
341 Technology R&D Project, Ministry of Health and Welfare, Republic of Korea (HI15C3224 to JWN).

342

343 **Ethics declarations**

344 All MM samples used in this study were prepared under the Human Biospecimen Ethics Guidelines  
345 and were approved by the Internal Review Board (IRB) of SNUH.

346

347 **Competing interests**

348 None declared

349

350

## 351 **Figure legends**

352 **Fig. 1.** A schematic overview of ETCHING. **a.** A schematic showing the flow through the ETCHING  
353 process, which comprises four stepwise modules (Filter, Caller, Sorter, and Fusion-identifier). **b.** The  
354 Filter module collects TS reads containing at least one TS  $k$ -mer not present in the  $k$ -mer sets (PGK,  
355 Normal, or PGKN). **c.** The percentage of TS reads that pass through the PGK, Normal, and PGKN  
356 filters. **d.** The mapping patterns of the total tumor reads (unfiltered, gray) and TS reads (filtered, blue)  
357 are shown for representative DEL, DUP, INV, and TRA loci via Integrative Genome Viewer. **e.** The  
358 mapping times (CPU times) required for the total tumor reads (Unfiltered) and TS reads filtered by  
359 PGK, Normal, and PGKN using BWA-MEM. **f.** The total running time (CPU time) of the SV callers.  
360 **g.** The precision, recall, and F1-scores of ETCHING with total tumor (Unfiltered) and TS reads  
361 collected by PGK, Normal, and PGKN. **(c,e-g)** The analyses were done with nine BRCA WGS  
362 datasets. The error bars indicate the first to third quartile range, and the height of the boxes indicate  
363 median values.

364

365 **Fig. 2.** Performances of ETCHING and benchmarking SV callers. **a.** PR curves of ETCHING and  
366 benchmarking tools on the HCC1395 dataset. The red symbols indicate the points corresponding to  
367 optimal parameters. **b.** Precision, recall, and F1-scores of ETCHING and benchmarking tools over  
368 sub-sampled data with different sequencing depths from the HCC1395 tumor sample. **c.** Precision,  
369 recall, and F1-scores of ETCHING and benchmarking tools for all types of SVs over nine hold-out  
370 test datasets of TCGA BRCA samples. Each dot denotes the performance of each tool on a sample.  
371 The height of the bar plots indicates the median performance of each tool on nine samples, and the red  
372 error bars are the first and third quartiles. **d.** The performances of ETCHING and benchmarking tools  
373 on four TCGA THCA samples. Because there were only a few true SVs from each of the samples, we  
374 combined them as one value. **e.** The performances of ETCHING and benchmarking tools on MM  
375 samples. **d,e.** Otherwise, as in (c).

376



377 **Fig. 3.** Prediction of SVs and FGs by SV callers using MM samples containing known clinical  
378 biomarkers and actionable SV targets. **a.** Known clinical SV and FG biomarkers (also known as  
379 clinical targets) of MM. The type of SV of known clinical biomarkers are indicated on the appropriate  
380 chromosomes. **b.** Summary of manually curated, experiment-supported, and ETCHING-detected SV  
381 biomarkers, known MM targets, and actionable targets from OncoKB (tier1, 2, and 3). **c.** ROC curves  
382 of ETCHING and benchmarking tools are shown along with accuracies (acc) and F1 scores as an inset.  
383 The accuracies and F1 scores were calculated on optimal parameters. **d.** The read-depth landscapes  
384 for chromosomes in which clinical biomarkers and targets were found. **e.** Experimental validation of  
385 three predicted actionable SV targets by PCR. The blue arrows indicate the expected sizes of the PCR  
386 amplicons in the gel images. ‘N’ indicates the normal sample and ‘T’ indicates the tumor sample.  
387 (bottom) The dotted lines indicate the junctions formed from tandem DUPs and DELs. The red arrows  
388 are the forward and reverse PCR primers.

389

390 **Fig. 4.** SV and FG predictions on targeted gene panel sequencing data. **a.** The TP calls (labeled as  
391 ‘Found’ in orange) and false negatives (labeled as ‘Missed’ in gray) of SV callers for cfDNA  
392 reference materials – CR, CMM, and MMv2 – with different mutant allele ratios (0.5 to 5.0%; gray to  
393 black). CR and CMM include *NCOA4-RET*, *EML4-ALK*, and *CD74-ROSI* FGs, and MMv2 includes  
394 *NCOA4-RET* and *TPR-ALK* FGs. **b.** The recall rates of benchmarking SV callers on the reference  
395 materials across different mutant allele ratios. **c.** The additional calls in target regions (colors) and  
396 non-target regions (gray). **d.** The heatmap summarizes the TPs (labeled as ‘Found’ in orange), false  
397 negatives (labeled as ‘Missed’ in gray), and additional calls for 105 cancer panel sequencing datasets.  
398 The panels on the right show the total number of TPs and additional calls. The white-to-black gradient  
399 indicates the number of additional calls on each SV caller. The color-coded charts (top) indicate  
400 cancer types, known alterations, and detection methods. Abbreviations: Diffuse large B-cell  
401 lymphoma (DLBCL), desmoplastic small round cell tumor (DSRC), gastrointestinal stromal tumor  
402 (GIST), acute lymphoblastic leukemia (ALL), primitive neuroectodermal tumor (PNET), follicular B-

403 cell lymphoma (FL), acute myeloid leukemia (AML), chronic myelogenous leukemia (CML), and  
404 lung adenocarcinoma (LA).

405

406 **Fig. 5.** Computational costs of ETCHING and the benchmarking tools. **a.** Stepwise comparison of the  
407 CPU times for SV prediction using ETCHING, with reads filtered by PGKN or with unfiltered reads,  
408 and using novoBreak. **b.** Algorithmic differences between ETCHING, novoBreak, and others  
409 (DELLY, LUMPY, Manta, and SvABA). **c.** RAM usage by the SV callers on TCGA-A2-A04P (20X  
410 tumor, 37X normal) and TCGA-A1-A0SM (61X tumor, 31X normal) datasets with 60 threads.

411

## 412 **METHODS**

### 413 ***k*-mer counting**

414 An efficient *k*-mer counting tool, KMC, was applied to count all possible *k*-mers (31-mers) from  
415 tumor and normal reads. *k*-mer counting can be done with multi-process (MP) computation. The  
416 results of *k*-mer counting are summarized in a histogram (Supplementary Fig. 1b) showing the *k*-mer  
417 depth (count) on the x-axis and the number of *k*-mers on the y-axis; the *k*-mer frequency shows a  
418 bimodal distribution for WGS data. A histogram of error-free *k*-mers is known to be close to a normal  
419 (Poisson) distribution, whereas rare *k*-mers, considered to be those with sequencing errors, show an  
420 exponentially decreasing curve over low depths. Hence, the local minimum was generally determined  
421 to be between *k*-mer depth 3–10, varying with the sequencing depth, quality, and tumor heterogeneity.  
422 Therefore, tumor *k*-mers with depth below the local minimum (the cutoff for erroneous *k*-mers) were  
423 removed, and the remaining error-free *k*-mers were subjected to the following steps (Supplementary  
424 Fig. 1a). For normal *k*-mers, those below *k*-mer depth 2 were removed and the remainder were added  
425 to the *k*-mer set (PGKN).

426 For targeted gene panel sequencing data, the local minimum is usually not presented as in  
427 WGS data. As the local minimum *k*-mer depth in WGS data is generally observed at a point about 10%  
428 of the distribution value at *k*-mer depth 2, we used the point as the local minimum *k*-mer depth in  
429 panel sequencing data.

430

### 431 **Roll-encoding**

432 To efficiently process *k*-mers, we introduced a roll-encoding strategy, which encodes a *k*-mer to a  
433 series of 2-bit numbers by our encoding rules: A to 00, C to 01, G to 11, and T to 10. Because the *k*-1  
434 nucleotides of the *i*-th and (*i*+1)th *k*-mers overlap, we can obtain the (*i*+1)th encoded *k*-mer simply by  
435 sliding a 2-bit number. This approach means that a new 2-bit number is added to the last nucleotide of  
436 the (*i*+1)th *k*-mer while the first 2-bit number is removed from the *i*-th encoded *k*-mer (Supplementary  
437 Fig. 16a). This procedure is repeated until the end of a read. Our roll-encoding also simultaneously  
438 encodes *k*-mer reverse complements. The smaller of the forward- and reverse-encoded values was

439 stored as a canonical encoded  $k$ -mer. This roll-encoding method appeared to be faster than methods  
440 with conventionally encoded and ordinary (not encoded)  $k$ -mers (Supplementary Fig. 16b).

441

#### 442 **The reference and normal $k$ -mer sets**

443 The reference  $k$ -mer set, PGK, is a unique set of  $k$ -mers from references (10 human genome  
444 assemblies; Supplementary Table 1) and those embedding common non-medical (nonpathogenic)  
445 SNPs in hg19 (GRCh37.p13) from dbSNP (release number 150). The normal  $k$ -mer set is from  
446 matched normal input reads. PGKN is a unique set of the PGK and the normal  $k$ -mers. For the  
447 YH\_1.0 genome assembly, which includes uncertain bases, all possible nucleotides were assigned to  
448 generate the  $k$ -mer set. The reference  $k$ -mer set (PGK) is stored as a binary database file for reuse. The  
449 PGK binary file can be downloaded from our website (<http://big.hanyang.ac.kr/ETCHING>).

450

#### 451 **Filter module**

452 The saved reference  $k$ -mer set (PGK) is loaded to a hash table in the Filter module. If there is a  
453 matched normal sample as input, then normal  $k$ -mers are added to the  $k$ -mer set (PGK + Normal).  
454 When tumor sequencing data are used as the input, they are decomposed into tumor  $k$ -mers. The  
455 tumor  $k$ -mers are then searched in the reference  $k$ -mer sets (PGK or PGKN). The tumor  $k$ -mers  
456 present in the reference  $k$ -mer set are regarded as reference  $k$ -mers; otherwise, they are regarded as TS  
457  $k$ -mers and subjected to the following read-collection step. The read-collection step collects TS reads  
458 embedding a TS  $k$ -mer. To speed up the read-collection step, a multi-processing procedure for  
459 simultaneously treating reading, collecting, and writing substeps was implemented (Supplementary  
460 Fig. 16c, d).

461

#### 462 **Reduced read mapping**

463 From the total input tumor reads, only TS reads collected through the Filter were mapped to the  
464 reference genome (hg19) using BWA-MEM with default parameters. We also used default parameters  
465 in read mapping for benchmarking tools.

466

#### 467 **Caller module**

468 After the TS reads are mapped, the Caller module finds BND candidates (BP pairs) by analyzing split  
469 reads with supplementary alignment (SA) tags, as follows (Supplementary Fig. 3). We focused on  
470 simply clipped pairs only, not on complex or double clipped reads, to reduce FP calls (Supplementary  
471 Fig. 3a). First, we defined a BP by its vector or chromosome (or contig/scaffold) name, its clipped  
472 position on the chromosome, and its clipped direction (Supplementary Fig. 3b). If a read was clipped  
473 in a region that is downstream of the BP, its clipped direction  $s$  is denoted as “+”. If a read was  
474 clipped in a region that is upstream of the BP, its clipped direction  $s$  is denoted as “-”. Thus, reads  
475 clipped at a locus can define a BND with a BP pair. A lack of SA tags in a clipped read indicates that  
476 there is a single BP that we called as a single-breakend (SND). Once all of the BNDs and SNDs are  
477 defined, BNDs are then classified by SV type (such as DEL, DUP, INV, or TRA), with their  
478 chromosome, BP position, and clipped direction information (Supplementary Fig. 3c).

479

#### 480 **Sorter module**

481 The Sorter module is a machine learning classifier that removes FP SVs from the Caller module  
482 outputs. Because ensemble machines usually show optimal performance in diverse problems, we  
483 applied RF (<https://github.com/crfllynn/skranger>), and extreme gradient boosting (XGB,  
484 <https://github.com/dmlc/xgboost>) models to this study. To train the models, we randomly selected 31  
485 training and 9 hold-out test samples from 55 BRCA samples (Supplementary Table 2; Supplementary  
486 Fig. 4a) as follows. We first predicted all possible SVs using five benchmarking SV callers and  
487 summarized tumor purities and sequencing depths for all 55 samples. Based on this information, we  
488 excluded (1) nine samples that had a low number of predicted SVs (<100) for at least one caller, (2)  
489 four samples with too many predicted SVs (>50,000 on average), and (3) two additional samples, one  
490 with the highest tumor read depth (93X) and one with the lowest tumor purity (0.474), to avoid  
491 extreme cases. From the remaining 40 samples, we randomly selected 31 and 9 samples so that there  
492 would be about a 3:1 ratio of SV candidates in the training and hold-out test datasets, respectively

493 (Supplementary Fig. 4a). There were 894,333 and 278,627 SV candidates in 31 training and 9 hold-  
494 out samples. For training data, we selected 315,949 SV candidates detected by the Caller module,  
495 which were subjected to the training step of the Sorter module.

496 There is no ground truth exhaustively validated by experiments for the TCGA dataset. Thus,  
497 we used silver standard SVs detected by multiple SV callers. Of 315,949 SV candidates predicted by  
498 the Caller module in 31 training samples, 10,736 SVs were simultaneously predicted by at least three  
499 SV callers (Supplementary Fig. 4b). We regarded them as silver standard SVs and the remainder  
500 (314,507 SVs) as false (Supplementary Fig. 4b, c). With the true and false SVs, we trained the models  
501 with six different features – clipped-read count (*CR*), split-reads count (*SR*), supporting paired-end  
502 read count (*PE*), average mapping quality (*MQ*), depth difference (*DD*), and total length of clipped  
503 bases (*TC*) (see Supplementary Note for more details). Our training procedure consists of an outer 10-  
504 fold cross-validation (*CV*) loop for training and an inner 10-fold *CV* loop for model selection  
505 (Supplementary Fig. 4d). The SVs in the training samples were split evenly into eleven sets, including  
506 ten outer-training sets (*TR\_out*) and one validation set (*VA*). During the outer 10-fold *CV*, a test set is  
507 selected (*TE*) from *TR\_out*, and the remaining nine sets were subjected to inner-training (*TR\_in*). The  
508 model selection process was done by inner 10-fold *CV* using *TR\_in*, which was evaluated on *TE*. The  
509 procedure was iteratively performed through an outer 10-fold *CV* loop. A final model was obtained  
510 by averaging ten trained models. We validated the final model on the *VA*.

511 We then searched the optimal classification cutoffs of RF and XGB scores using the *VA* set  
512 (Supplementary Fig. 4f). F1-scores of RF (or XGB) showed robust performances in the range from  
513 0.2 to 0.8 (from 0.05 to 0.95 for XGB). We used RF as default ML module in this study.

514

#### 515 **Parameter optimization for benchmarking SV callers**

516 ETCHING was benchmarked to the popular, high performing SV callers DELLY, LUMPY, Manta,  
517 SvABA, and novoBreak over WGS data, cfDNA reference materials, and targeted gene panel  
518 sequencing data from tumor samples. We also benchmarked Breakmer for cfDNA reference  
519 materials and targeted gene panel sequencing data.

520 For a fair comparison on WGS datasets, we searched optimal parameters of benchmarking  
521 tools corresponding to the nearest points to the perfect performance (where precision and recall rates  
522 are 100%) over PR-curves on HCC1395 data (Fig. 2a). The point minimizes the distance,  
523  $\sqrt{(1-P)^2 + (1-R)^2}$ , to (1,1) on given PR-curve, where  $P$  and  $R$  refer to precision and recall,  
524 respectively. DELLY's optimal parameter was near its default parameter (-a 0.2), LUMPY was -m 12  
525 option, and Manta was *minEdgeObservations* = 12 and *minCandidateSpanningCount* = 12. For  
526 SvABA, log-odd ratios of real and artifact variants  $\geq 32$  was the optimal one. novoBreak's PR curve  
527 was closest to the corner for its statistical quality score  $\geq 40$ . The statistical quality score is defined  
528 as  $-10 \log_{10} \frac{P(D|reference\ alleles\ or\ germline\ variations)}{P(D|somatic\ variations)}$ , where  $D$  is the number of read counts  
529 supporting each variation or reference allele.

530 For cfDNA reference materials and targeted gene panel sequencing data, all tools were  
531 applied with default parameter sets. Manta was run with --tumorBam --exome options.

532

### 533 Evaluation metrics

- 534  True positive (TP): Predicting true SVs (or biomarkers) as positive.  
535  False negative (FN): Predicting true SVs (or biomarkers) as negative.  
536  False positive (FP): Predicting false SVs (or biomarkers) as positive.  
537  True negative (TN): Predicting false SVs (or biomarkers) as negative.

538 Given the TP, FN, FP, and TN metrics, the recall, sensitivity, precision, specificity, F1-score, and  
539 accuracy are estimated as follows:

540 •  $Recall = Sens = \frac{TP}{TP+FN}$

541 •  $Precision = \frac{TP}{TP+FP}$

542 •  $Specificity = \frac{TN}{TN+FP}$

543 •  $F1 = \frac{2\ Recall\ Precision}{Recall + Precision}$

544 •  $Accuracy = \frac{TP+TN}{TP+TN+FP+FN}$

545

546 **Public WGS datasets**

547 55 BRCA WGS datasets and 4 THCA WGS datasets were downloaded from TCGA  
548 (<https://cancergenome.nih.gov>).

549

550 **MM WGS data**

551 Tumor cells were collected from bone marrow using CD138+ MACS sorting (Miltenyi Biotec,  
552 Auburn, CA) and DNA was extracted from the tumor cells for WGS library preparation. For matched  
553 normal samples, DNA was extracted from patients' saliva with RNase treatment. Sequencing libraries  
554 were generated using a TruSeq nano DNA library prep kit (Illumina, San Diego, CA) following the  
555 manufacturer's recommendations and sheared DNA fragments were end-repaired and size-selected to  
556 obtain DNA fragments around 350bp. Following PCR amplification, the DNA libraries were  
557 sequenced using the HiSeq™ X platform (Illumina). The 26 MM WGS datasets were produced and  
558 deposited in the CODA (registration number: R002594) of the Korean National Institute of Health.  
559 The study was approved by the Internal Review Board of Seoul National University Hospital (H-  
560 1103-004-353).

561

562 **FISH and karyotyping**

563 Cytogenetic studies were performed at SNUH. Unstimulated bone marrow cells obtained at MM  
564 diagnosis were cultured for 24h; then, karyotypes were analyzed using the standard G-banding  
565 technique. The karyotypes were constructed and chromosomal abnormalities were reported according  
566 to the International System for Human Cytogenetic Nomenclature<sup>37</sup>. Interphase FISH was performed  
567 on myeloma cells from the bone marrow samples obtained at diagnosis according to the probe  
568 manufacturer's instructions. Seven commercially available FISH probe sets were used. These  
569 included *IGH* dual-color, break-apart rearrangement probe; *TP53* SpectrumOrange probe; *RBI*  
570 D13S25 (13q14.3) SpectrumOrange probe; *IGH-FGFR3* dual-color, dual-fusion translocation probe;  
571 1q21 SpectrumGreen probe; and *p16* (9p21, *CDKN2A*), SpectrumOrange/CEP9 SpectrumGreen probe



572 (Abbott Diagnostics, Abbott Park, IL). The FISH experiments were performed on 26 MM specimens.

573 The FISH probe sequences are summarized in Supplementary Table 6.

574

#### 575 **PCR validation of actionable targets**

576 PCR amplification was performed using the primer sets listed in Supplementary Table 9. Targets were

577 amplified using primers designed in the flanking region of the junction. GAPDH was used as a

578 control for assessing the PCR efficiency and for subsequent analysis by agarose gel electrophoresis.

579

#### 580 **Manual curation of biomarkers and actionable targets in MM samples**

581 The SV biomarkers and actionable targets were manually curated with all mapped reads. The

582 candidate DELs and DUPs were checked by considering minor allele frequencies and read depth

583 changes across chromosomes (Supplementary Fig. 11a,b), remaining focal DELs and DUPs. For *IGH*-

584 associated TRA, candidate TRAs with which >10 paired-reads (mapping quality  $\geq 20$ ) are connected

585 between *IGH* locus (14q32) and other loci in tumor but not in normal were selected as true somatic

586 TRAs (Supplementary Fig. 11c,e). The candidates with the connection both in tumor and normal were

587 considered as germline TRAs (Supplementary Fig. 11d). The read depth, minor allele frequency,

588 discordant paired-read data to inspect true SVs during manual curation were summarized in

589 Supplementary Material.

590

#### 591 **Cell-free DNA reference materials**

592 Targeted sequencing data from cfDNA reference materials (SeraCare, Milford, MA) were generated.

593 DNA libraries were prepared using a KAPA Hyper Prep kit (Kapa Biosystems, Woburn, MA) as

594 described previously. Hybrid selection for target enrichment was performed using customized baits

595 targeting 38 cancer-related genes. After hybrid selection, the libraries were pooled, amplified, purified,

596 quantified, and then subjected to cluster amplification according to the manufacturer's protocol

597 (Illumina). Flow cells were sequenced in the 150bp paired-end mode using a NextSeq 500/550 High

598 Output Kit v2.5 (Illumina). The mean target coverage was 2023X. Two kinds of DNA mixtures, with

599 the frequency of variant alleles ranging from 0.5–5.0% (CMM and MMv2), and a plasma-like DNA  
600 mixture, with the frequency of variant alleles ranging from 0.5–2.5% (CR), were generated along with  
601 WT DNA (Supplementary Table 10). The WT material was used as the matched normal. Note that  
602 DELLY displayed a low recall in normal-matched case, since it excessively removed SV calls using  
603 matched-normal data in the filtration step (Supplementary Fig. 12). The BreaKmer tool was excluded  
604 from this analysis because it failed to call variants from any sample, presumably because its approach  
605 is not feasible for such low allele frequencies.

606

### 607 **Cancer panel datasets**

608 For cancer panel data of BreaKmer, we downloaded hybrid capture targeted gene panel data (110  
609 replicates from 38 cancer samples). Because the normal samples that were provided are not matched  
610 to the cancer samples, they were excluded from the analysis. One sample with three replicates was  
611 also excluded from this analysis, since it was marked as non-cancer sample rather than diagnosed  
612 cancer type (SRR1304190-2). Two datasets (SRR1304204, SRR1304210) failed to run in at least one  
613 benchmarking tool, so the remaining 105 replicates from 37 sample (216X mean coverage of the  
614 targets) were analyzed. Because the sample labels in SRA are inconsistent with those in BreaKmer  
615 paper, we used ones described in the paper.

616 To reproduce the results of previous BreaKmer study, we needed to install the same version  
617 of BreaKmer with detailed information of target bait. However, we failed to install the same version  
618 of BreaKmer in their publication, and the bait information was also unavailable. Hence, we tested two  
619 other releases, v0.0.4 and v0.0.6. The version v0.0.6 found 78 true SVs out of 105 and only 487  
620 additional calls, while v0.0.4 found 70 true SVs with 17,738 additional calls. Thus, we selected v0.0.6  
621 for comparison. To substitute the missing target bait information, we used the genomic coordinates of  
622 target gene regions.

623 In case of novoBreak, it requires normal sequencing data. However, there is no matched  
624 normal samples in the panel data. For the reasons, we simulated WGS reads (30X coverage) from  
625 hg19 using an in-house script for novoBreak.

626 *FLT3* indel (30–73bp) and *KIT* deletion (48bp) were included in the list of known target  
627 alterations. As SvABA separately reports indels as output, we used SvABA high-confidence indel  
628 report along with its SVs. However, although Manta also reports indels, we did not use them because  
629 they are unfiltered candidates.

630

## 631 **Supplementary information**

### 632 **Supplementary Note:**

633 Graph theory presentation for SV analysis

634 Six features for machine learning

635 Commands for benchmarking tools

636 High quality SVs

637

638 **Supplementary Fig. 1. a.** Detailed workflow of the ETCHING pipeline. MP and SP indicate multiple  
639 and single processing, respectively. **b.** A representative  $k$ -mer distribution of WGS data.

640

641 **Supplementary Fig. 2. a.** The size of the unique set containing the hg19 and PGK  $k$ -mers. **b.** The size  
642 of the unique set containing the  $k$ -mers not present in hg19.

643

644 **Supplementary Fig. 3. a.** The Caller module uses simply clipped reads (left side) but excludes reads  
645 that make complex clipped pairs (right side). **b.** Each BND is a pair of BPs, *i.e.*  $(BP_i, BP_j)$ . An SND is  
646 a single-BND consisting of one BP with a dangling point, *i.e.*  $(BP_i, \phi)$ . If a BP displays reads clipped  
647 in a direction at position  $x$  on chromosome  $c$ , we define that BP as a node  $(c, x, s)$ , where  $s$  indicates  
648 its clipped direction (+1 or -1). **c.** Classification of SV types. For a BND  $(BP_i, BP_j)$ ,  $x_i$  and  $x_j$  are the  
649 positions on chromosome  $c$ , and  $s_i$  and  $s_j$  are the clipped directions of each BP. The table on the right  
650 side shows the classification criteria for SVs.

651

652 **Supplementary Fig. 4. a.** A flowchart for selecting training data from BRCA samples. **b.** A Venn  
653 diagram of SVs predicted by ETCHING and other tools in the training set. **c.** The numbers of SVs  
654 predicted by multiple callers were tallied in a histogram. The number of SVs are indicated on the y-  
655 axis and the number of tools that predicted the corresponding SVs are indicated on the x-axis. The  
656 vertical line denotes the cutoff for selecting silver standard SVs. **d.** A schematic workflow for training  
657 machine learning modules. **e.** Training and validation results of machine learning. **f.** Optimized  
658 cutoffs of machine learning methods. We set the optimized cutoff to 0.4 for RF and XGB.

659

660 **Supplementary Fig. 5.** The wall-clock times used by ETCHING and other tools on nine hold-out  
661 BRCA samples, which were measured using 30 threads.

662

663 **Supplementary Fig. 6.** The effectiveness of the Filter module on HCC1395 data. **a.** The percentage  
664 of TS reads that passed the PGK, Normal, and PGKN filters. **b.** The precision, recall, and F1-scores of  
665 the ETCHING results from total reads (unfiltered) and TS reads collected by the PGK, Normal, and  
666 PGKN filters.

667

668 **Supplementary Fig. 7.** Benchmarking results on THCA samples by SV type.

669

670 **Supplementary Fig. 8.** Strategies for HQ SV detection using tumor (HCC1395) and normal  
671 sequencing data (HCC1395 BL). **a.** The landscape of the depth change within the HQ DELs and HQ  
672 DUPs. **b.** The landscape of the discordant read-pairs connecting BPs within the HQ INVs and HQ  
673 TRAs. (**c** and **d**). The ROC curve (left) and the density distribution (right) for setting the cutoff using  
674 the depth difference score (DS) of DELs (**c**) and DUPs (**d**). **e.** The ROC curve for setting the cutoff  
675 using the connected-pair score (CS) of the HQ INVs and TRAs. **f.** Bar plot showing the count of HQ  
676 SVs and all SVs. DS and CS are defined in Supplementary Note.

677

678 **Supplementary Fig. 9.** Benchmarking results on BRCA, MM, and THCA samples with HQ SVs.

679

680 **Supplementary Fig. 10.** Benchmarking results on MM samples by SV type.

681

682 **Supplementary Fig. 11.** Rational for SV manual curation **a.** *RBI* biomarker shown with unbalanced  
683 minor allele frequency (MAF) and read depth change on Chr13 in MM20. **b.** *AKT1* DUP locus shown  
684 with unbalanced MAF and read depth change on Chr14 in MM22. **c.** Discordant paired-reads  
685 connected between *IGH* locus and Chr11 of MM6. The blue dot near 69M indicates a TRA,  
686 t(11;14)(q13;q32), including *CCND1* gene in tumor. **d.** Germline TRA with discordant paired-reads  
687 both in tumor and normal. **e.** An instance of manually curated TRAs is shown in IGV.

688

689 **Supplementary Fig. 12.** SV and FG prediction on targeted gene panel sequencing data paired with  
690 sequencing data from WT alleles (regarded as matched normal). Otherwise, as in Fig. 4a–c.

691

692 **Supplementary Fig. 13.** Indels associated with *FLT3* in eight different samples. The index numbers  
693 are the same ones in Fig. 4d.

694

695 **Supplementary Fig. 14.** The wall-clock times used by ETCHING, ETCHING without filter  
696 (unfiltered), and novoBreak on HCC1395 data on 30 threads.

697

698 **Supplementary Fig. 15.** The wall-clock times used by ETCHING with different thread numbers  
699 ranging from 5 to 50.

700

701 **Supplementary Fig. 16. a.** Schematic of the roll-encoding algorithm for processing *k*-mers. As a *k*-  
702 mer window slides, it updates an encoded value using our encoding rule. **b.** The computing costs of  
703 the Read-collector using the conventional encoding method, ordinary *k*-mers, and roll-encoding  
704 methods on tumor (46X) and normal (31X) WGS data with 30 threads. **c.** A schematic workflow of

705 parallel computing for read collection. **d.** Data from the read collection step are processed by parallel  
706 computing.

707

## 708 **Supplementary Tables**

709 **Supplementary Table 1.** Reference genomes and dbSNP used in PGK

710 **Supplementary Table 2.** BRCA samples

711 **Supplementary Table 3.** THCA samples

712 **Supplementary Table 4.** MM samples

713 **Supplementary Table 5.** FISH and karyotype in MM samples

714 **Supplementary Table 6.** FISH probe sets

715 **Supplementary Table 7.** Manually curated partner BPs of *IGH* TRAs.

716 **Supplementary Table 8.** BreaKmer panel data

717 **Supplementary Table 9.** PCR primer sets

718 **Supplementary Table 10.** Reference material

719

## 720 **References**

721 1. Chiang, C. et al. The impact of structural variation on human gene expression. *Nat Genet* **49**,  
722 692-699 (2017).

723 2. Sharp, A.J., Cheng, Z. & Eichler, E.E. Structural variation of the human genome. *Annu Rev*  
724 *Genomics Hum Genet* **7**, 407-442 (2006).

725 3. Mitelman, F., Johansson, B. & Mertens, F. The impact of translocations and gene fusions on  
726 cancer causation. *Nat Rev Cancer* **7**, 233-245 (2007).

727 4. Stratton, M.R., Campbell, P.J. & Futreal, P.A. The cancer genome. *Nature* **458**, 719-724  
728 (2009).

729 5. Meyerson, M., Gabriel, S. & Getz, G. Advances in understanding cancer genomes through  
730 second-generation sequencing. *Nature Reviews Genetics* **11**, 685-696 (2010).

- 731 6. Stankiewicz, P. & Lupski, J.R. Structural variation in the human genome and its role in  
732 disease. *Annu Rev Med* **61**, 437-455 (2010).
- 733 7. Macintyre, G., Ylstra, B. & Brenton, J.D. Sequencing Structural Variants in Cancer for  
734 Precision Therapeutics. *Trends Genet* **32**, 530-542 (2016).
- 735 8. Di Fiore, P.P. et al. erbB-2 is a potent oncogene when overexpressed in NIH/3T3 cells.  
736 *Science* **237**, 178-182 (1987).
- 737 9. Slamon, D.J. et al. Human breast cancer: correlation of relapse and survival with  
738 amplification of the HER-2/neu oncogene. *Science* **235**, 177-182 (1987).
- 739 10. Soda, M. et al. Identification of the transforming EML4-ALK fusion gene in non-small-cell  
740 lung cancer. *Nature* **448**, 561-566 (2007).
- 741 11. Lugo, T.G., Pendergast, A.M., Muller, A.J. & Witte, O.N. Tyrosine kinase activity and  
742 transformation potency of bcr-abl oncogene products. *Science* **247**, 1079-1082 (1990).
- 743 12. Abyzov, A., Urban, A.E., Snyder, M. & Gerstein, M. CNVnator: an approach to discover,  
744 genotype, and characterize typical and atypical CNVs from family and population genome  
745 sequencing. *Genome Res* **21**, 974-984 (2011).
- 746 13. Chen, K. et al. BreakDancer: an algorithm for high-resolution mapping of genomic structural  
747 variation. *Nat Methods* **6**, 677-681 (2009).
- 748 14. Ye, K., Schulz, M.H., Long, Q., Apweiler, R. & Ning, Z. Pindel: a pattern growth approach to  
749 detect break points of large deletions and medium sized insertions from paired-end short  
750 reads. *Bioinformatics* **25**, 2865-2871 (2009).
- 751 15. Wang, J. et al. CREST maps somatic structural variation in cancer genomes with base-pair  
752 resolution. *Nat Methods* **8**, 652-654 (2011).
- 753 16. Schroder, J. et al. Socrates: identification of genomic rearrangements in tumour genomes by  
754 re-aligning soft clipped reads. *Bioinformatics* **30**, 1064-1072 (2014).
- 755 17. Rausch, T. et al. DELLY: structural variant discovery by integrated paired-end and split-read  
756 analysis. *Bioinformatics* **28**, i333-i339 (2012).

- 757 18. Yang, L. et al. Diverse mechanisms of somatic structural variations in human cancer genomes.  
758 *Cell* **153**, 919-929 (2013).
- 759 19. Layer, R.M., Chiang, C., Quinlan, A.R. & Hall, I.M. LUMPY: a probabilistic framework for  
760 structural variant discovery. *Genome Biol* **15**, R84 (2014).
- 761 20. Chen, X. et al. Manta: rapid detection of structural variants and indels for germline and cancer  
762 sequencing applications. *Bioinformatics* **32**, 1220-1222 (2016).
- 763 21. Wala, J.A. et al. SvABA: genome-wide detection of structural variants and indels by local  
764 assembly. *Genome Res* **28**, 581-591 (2018).
- 765 22. Chong, Z. et al. novoBreak: local assembly for breakpoint detection in cancer genomes. *Nat*  
766 *Methods* **14**, 65-67 (2017).
- 767 23. Consortium, I.T.P.-C.A.o.W.G. Pan-cancer analysis of whole genomes. *Nature* **578**, 82-93  
768 (2020).
- 769 24. Collins, R.L. et al. A structural variation reference for medical and population genetics.  
770 *Nature* **581**, 444-451 (2020).
- 771 25. Cameron, D.L., Di Stefano, L. & Papenfuss, A.T. Comprehensive evaluation and  
772 characterisation of short read general-purpose structural variant calling software. *Nat*  
773 *Commun* **10**, 3240 (2019).
- 774 26. Gong, T., Hayes, V.M. & Chan, E.K.F. Detection of somatic structural variants from short-  
775 read next-generation sequencing data. *Brief Bioinform* (2020).
- 776 27. Zhang, J. et al. INTEGRATE: gene fusion discovery using whole genome and transcriptome  
777 data. *Genome Res* **26**, 108-118 (2016).
- 778 28. Li, H. Aligning sequence reads, clone sequences and assembly contigs with BWA-MEM.  
779 *arXiv:1303.3997* (2013).
- 780 29. Wright, M.N. & Ziegler, A. ranger: A Fast Implementation of Random Forests for High  
781 Dimensional Data in C++ and R. *Journal of Statistical Software* **77** (2017).
- 782 30. Kosugi, S. et al. Comprehensive evaluation of structural variation detection algorithms for  
783 whole genome sequencing. *Genome Biol* **20**, 117 (2019).



- 784 31. Avet-Loiseau, H. et al. High incidence of translocations t(11;14)(q13;q32) and  
785 t(4;14)(p16;q32) in patients with plasma cell malignancies. *Cancer Res* **58**, 5640-5645 (1998).
- 786 32. Chakravarty, D. et al. OncoKB: A Precision Oncology Knowledge Base. *JCO Precis Oncol*  
787 **2017** (2017).
- 788 33. Abo, R.P. et al. BreaKmer: detection of structural variation in targeted massively parallel  
789 sequencing data using kmers. *Nucleic Acids Res* **43**, e19 (2015).
- 790 34. Kokot, M., Dlugosz, M. & Deorowicz, S. KMC 3: counting and manipulating k-mer statistics.  
791 *Bioinformatics* **33**, 2759-2761 (2017).
- 792 35. Zito Marino, F. et al. A new look at the ALK gene in cancer: copy number gain and  
793 amplification. *Expert Rev Anticancer Ther* **16**, 493-502 (2016).
- 794 36. Pasini, L. et al. TrkA is amplified in malignant melanoma patients and induces an anti-  
795 proliferative response in cell lines. *BMC Cancer* **15**, 777 (2015).
- 796 37. Slovak, M. & Campbell, L. International System of Human Cytogenetic Nomenclature. *ISCN*,  
797 *S Karger AG, Basel, Switzerland* (2009).
- 798

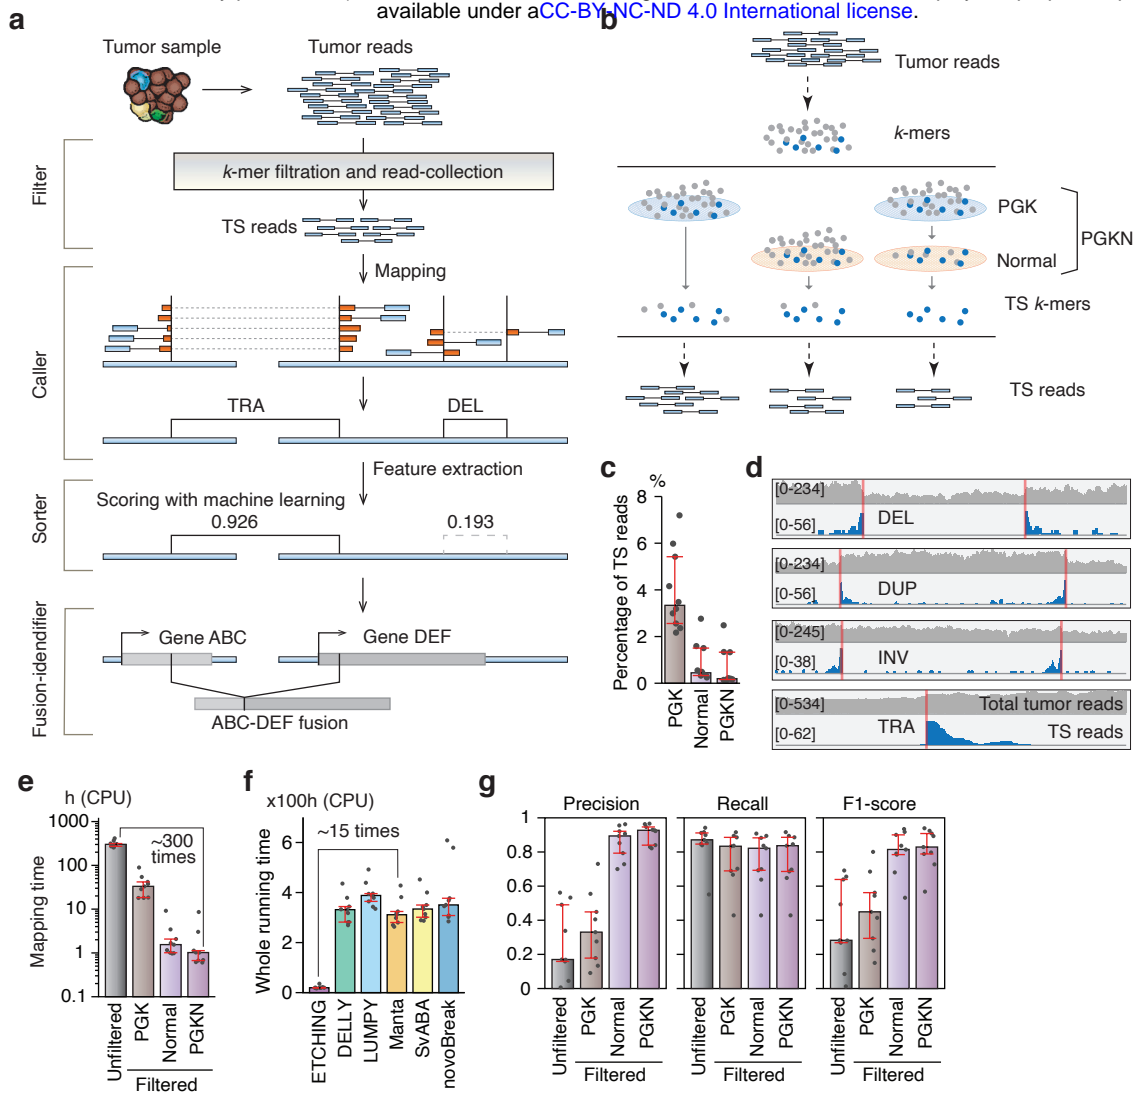

**Fig. 2**

bioRxiv preprint doi: <https://doi.org/10.1101/2020.10.25.354456>; this version posted October 26, 2020. The copyright holder for this preprint (which was not certified by peer review) is the author/funder, who has granted bioRxiv a license to display the preprint in perpetuity. It is made available under aCC-BY-NC-ND 4.0 International license.

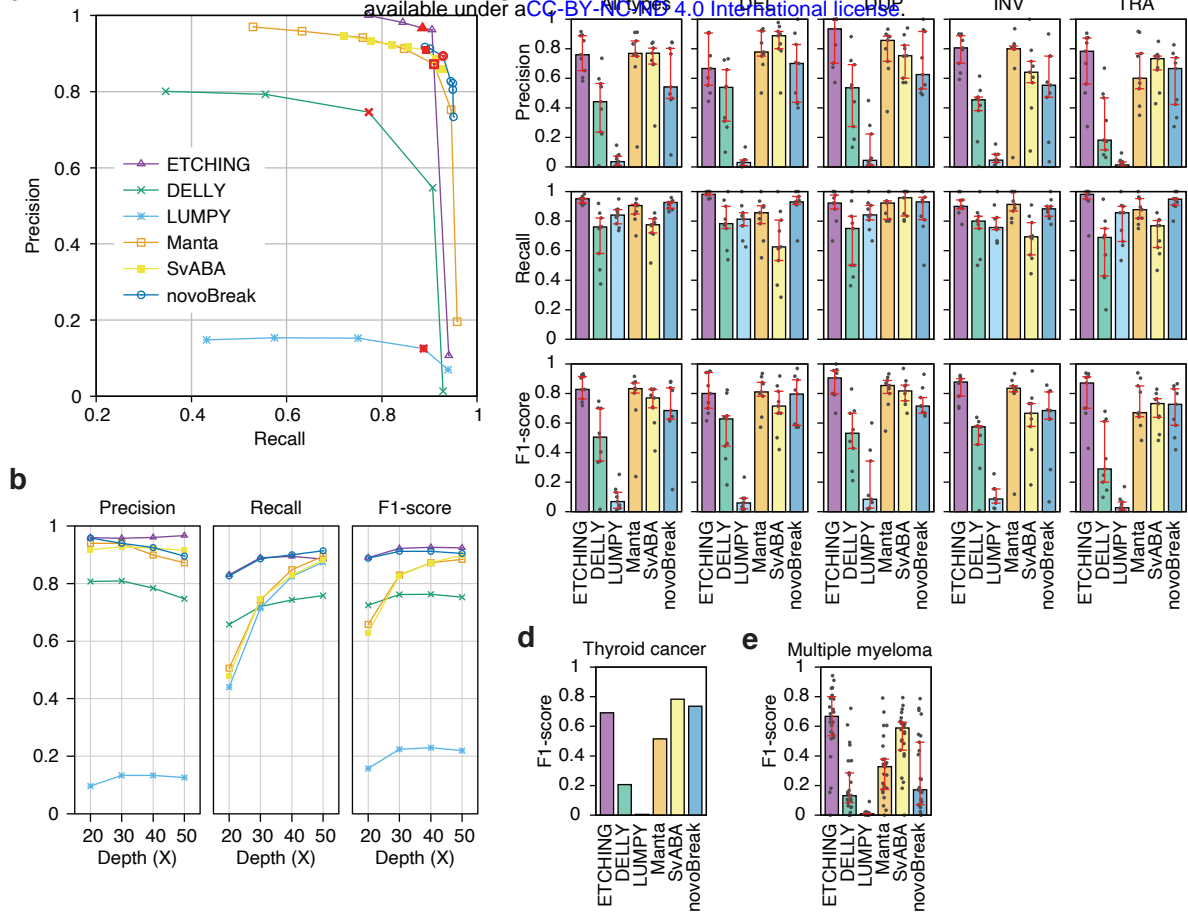

**Fig. 3**

bioRxiv preprint doi: <https://doi.org/10.1101/2020.10.25.354456>; this version posted October 26, 2020. The copyright holder for this preprint (which was not certified by peer review) is the author/funder, who has granted bioRxiv a license to display the preprint in perpetuity. It is made available under aCC-BY-NC-ND 4.0 International license.

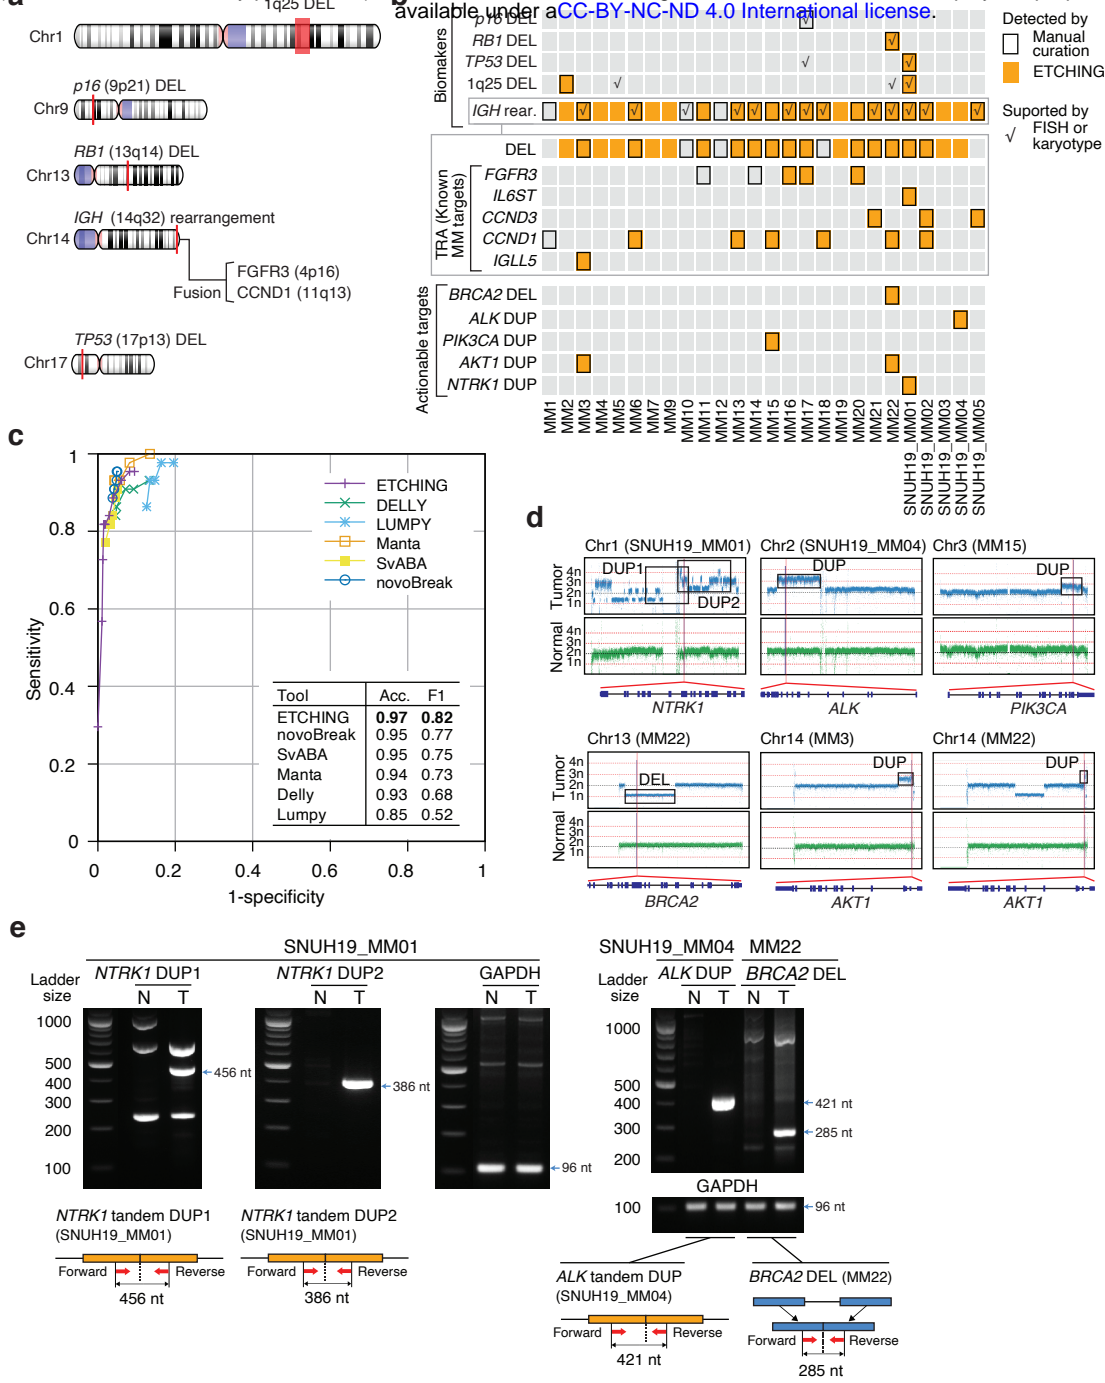

**Fig 4** preprint doi: <https://doi.org/10.1101/2020.10.25.354456>; this version posted October 26, 2020. The copyright holder for this preprint (which was not certified by peer review) is the author/funder, who has granted bioRxiv a license to display the preprint in perpetuity. It is made available under a [CC-BY-NC-ND 4.0 International license](#).

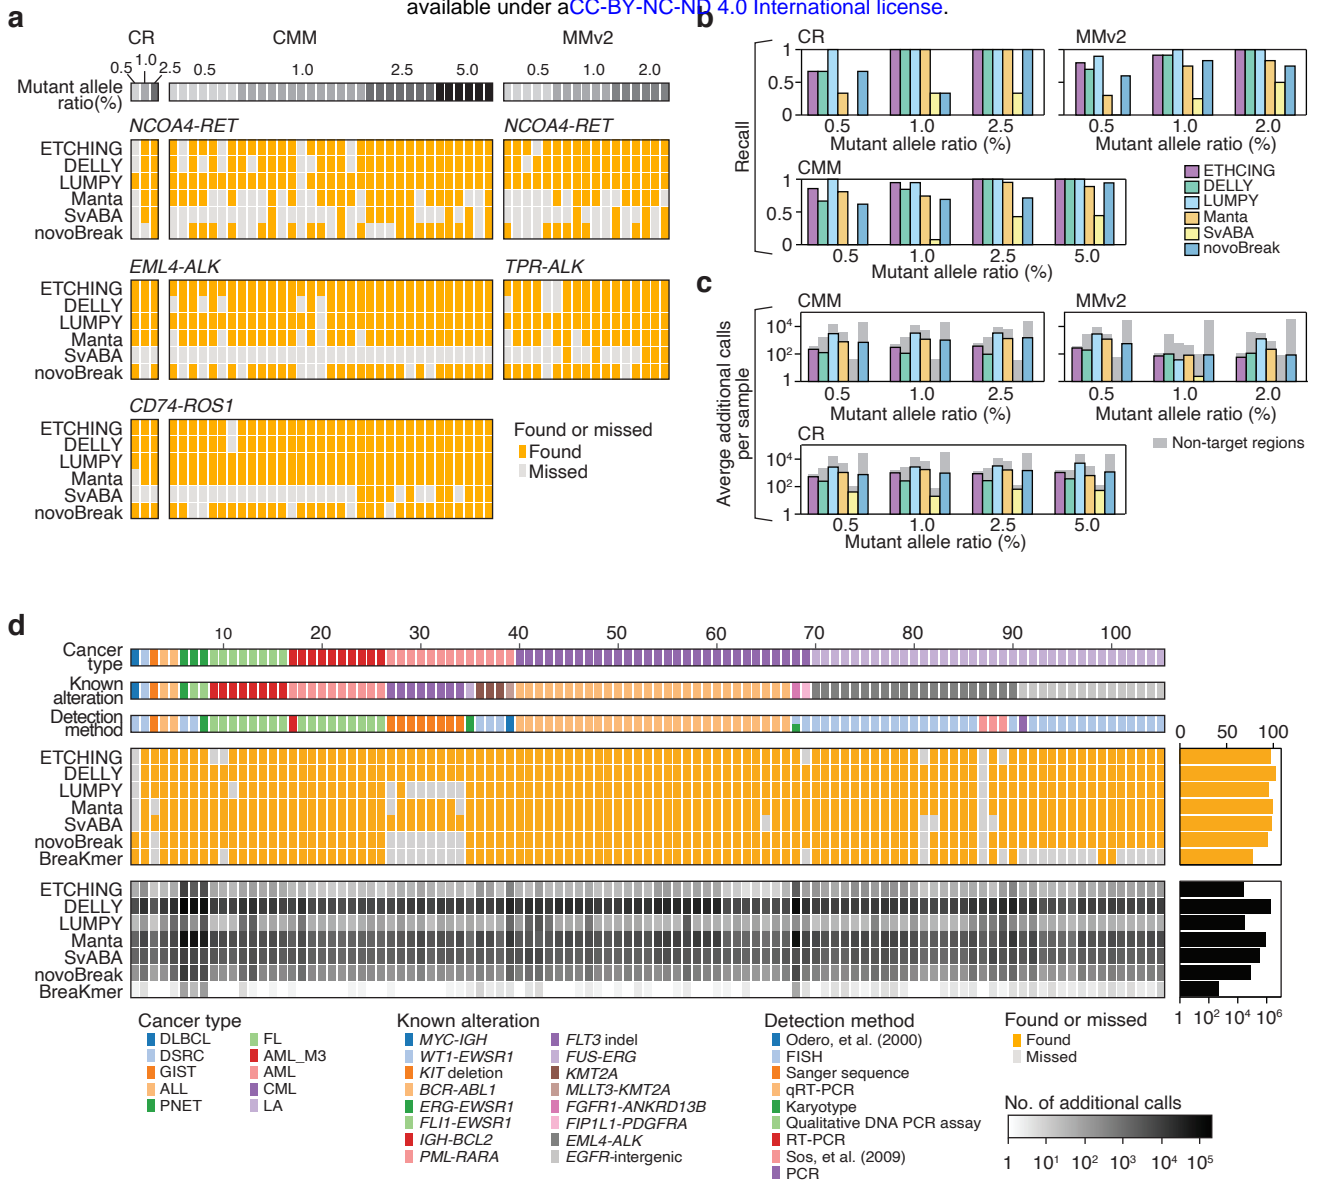

**Fig. 5**

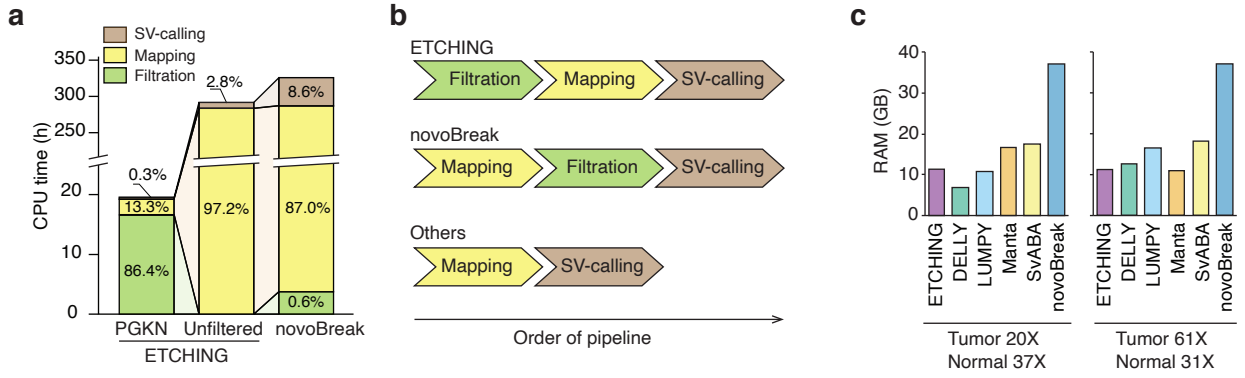

Source: https://www.biorxiv.org/content/10.1101/2020.10.25.354456v1.full.pdf
